# Supplementary material
Source: PubMed Central journal article supplement (PMC3375699)

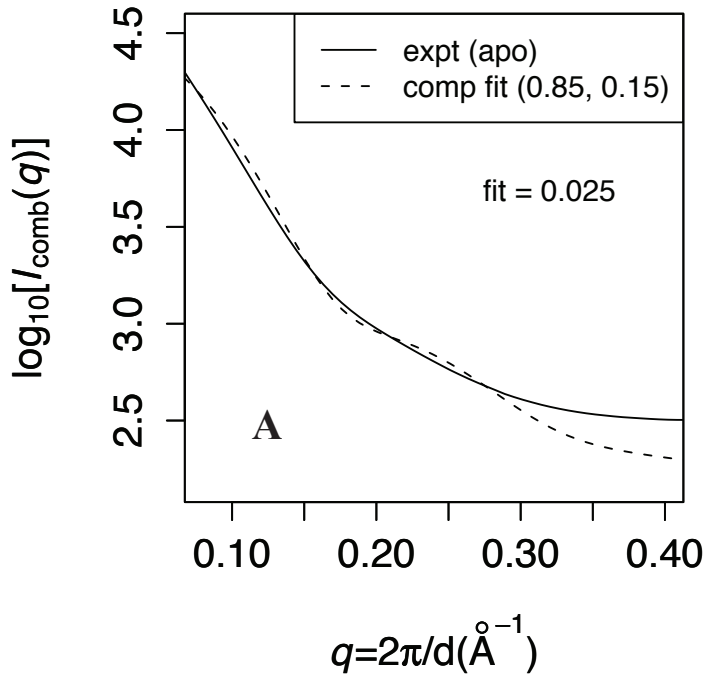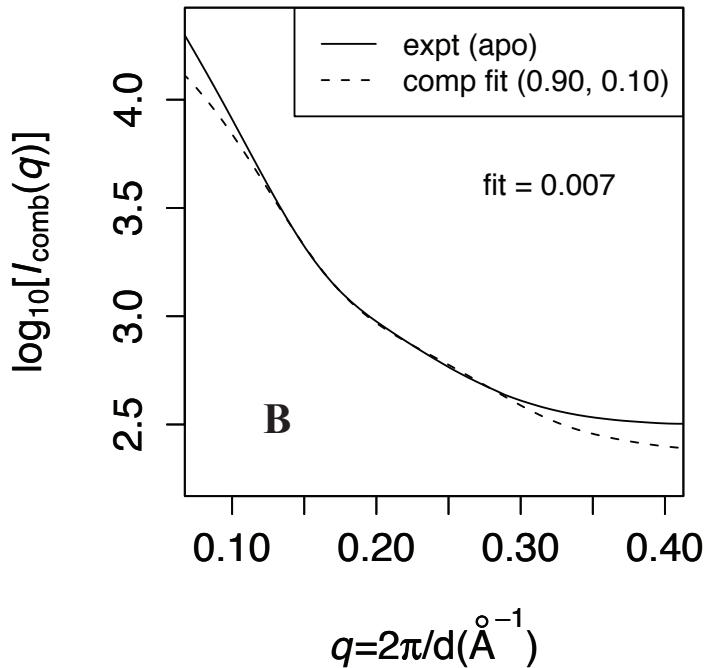

Supplement: NIHMS321248-supplement-02.pdf [file NIHMS321248-supplement-02.pdf]

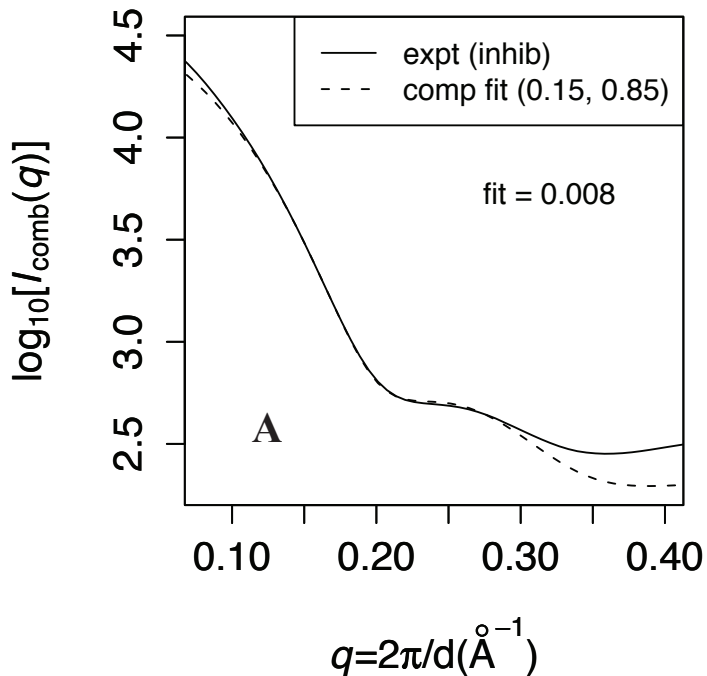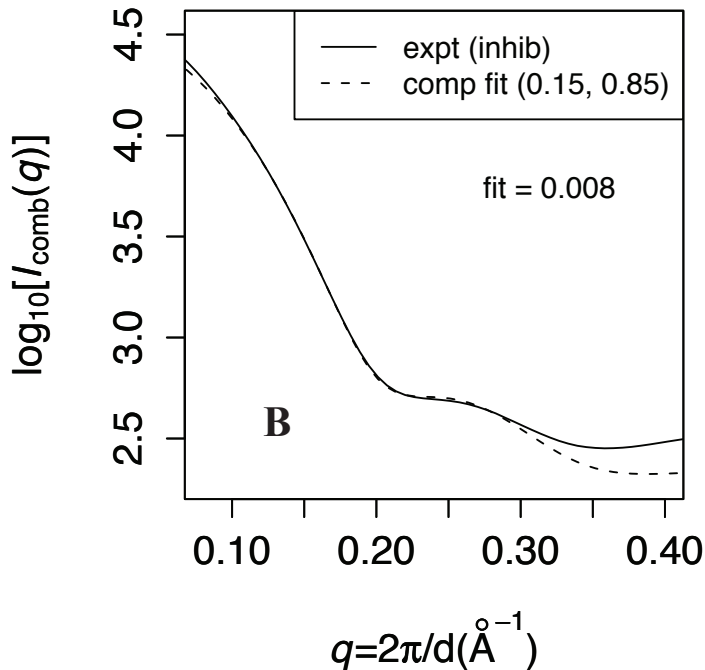

Supplement: NIHMS321248-supplement-03.pdf [file NIHMS321248-supplement-03.pdf]

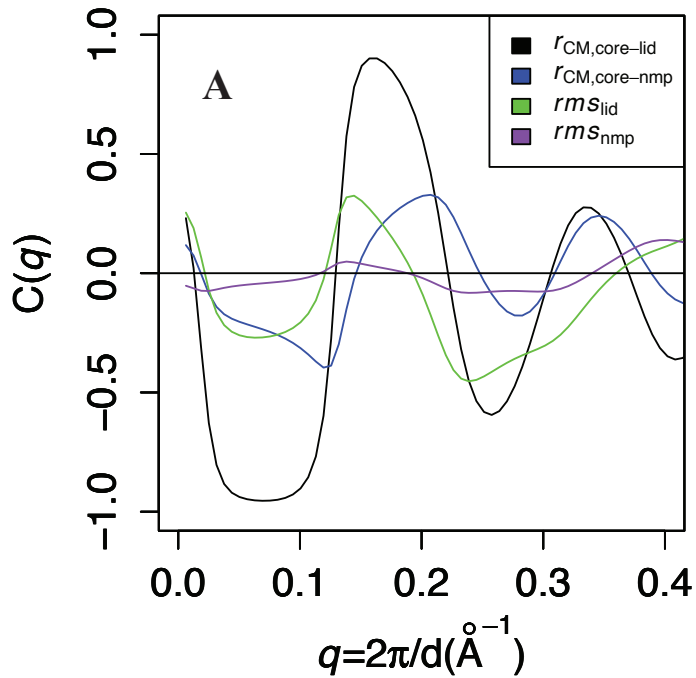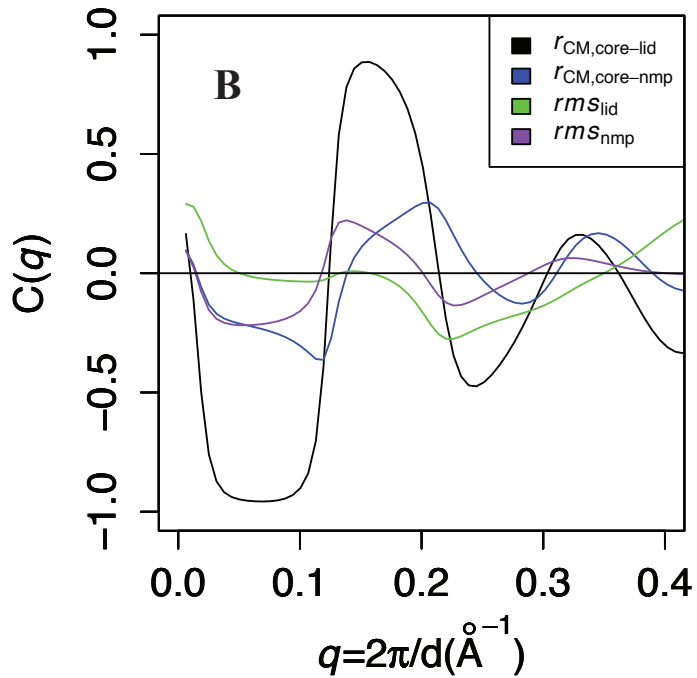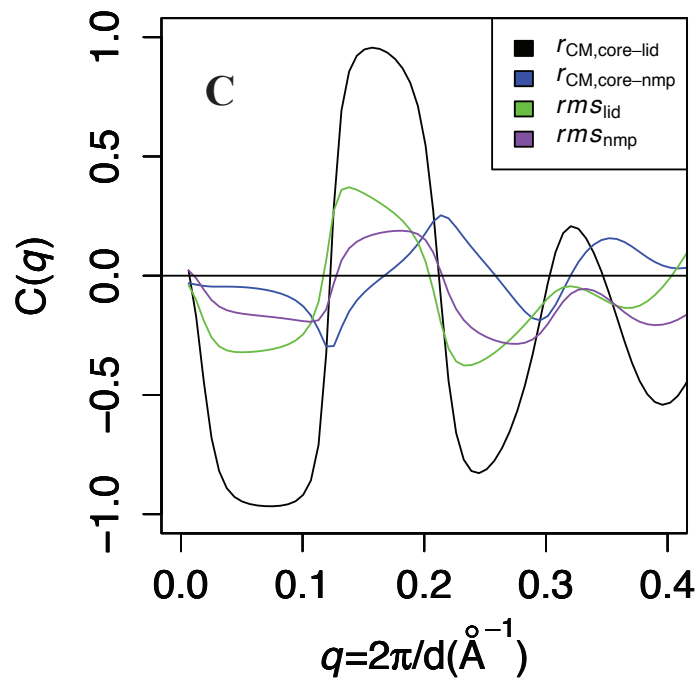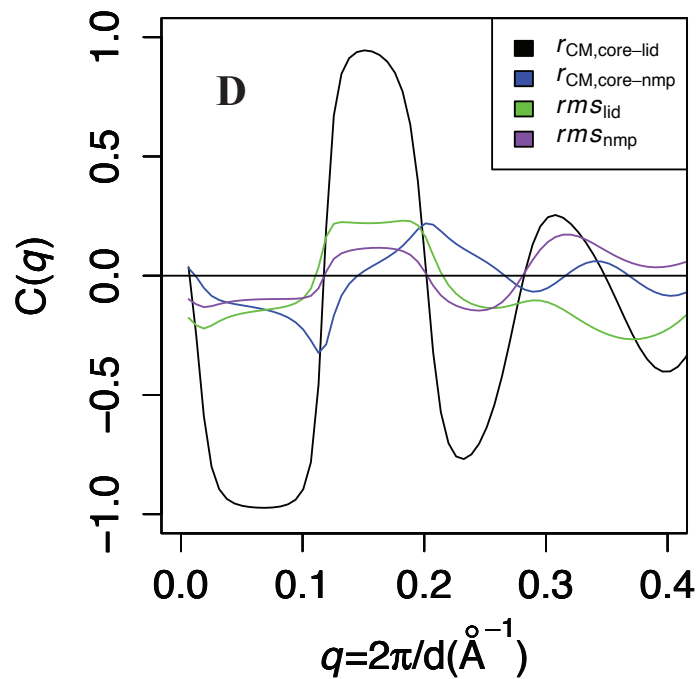

Supplement: NIHMS321248-supplement-05.pdf [file NIHMS321248-supplement-05.pdf]

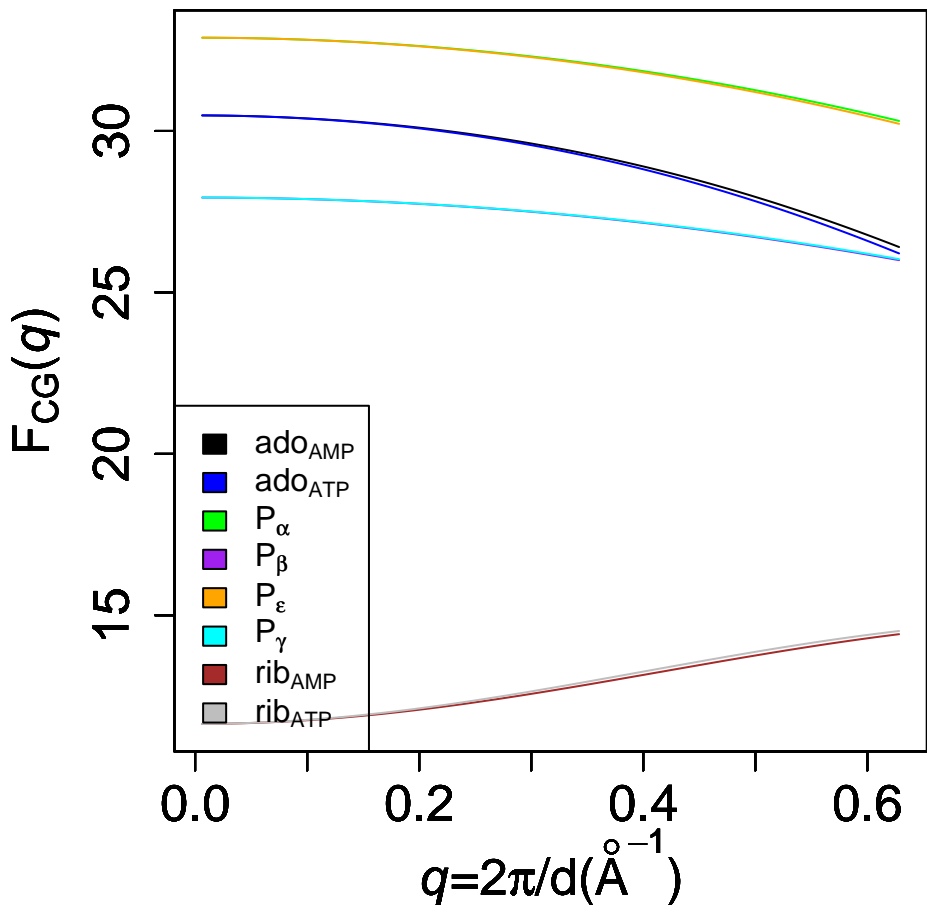

Supplement: NIHMS321248-supplement-06.pdf [file NIHMS321248-supplement-06.pdf]

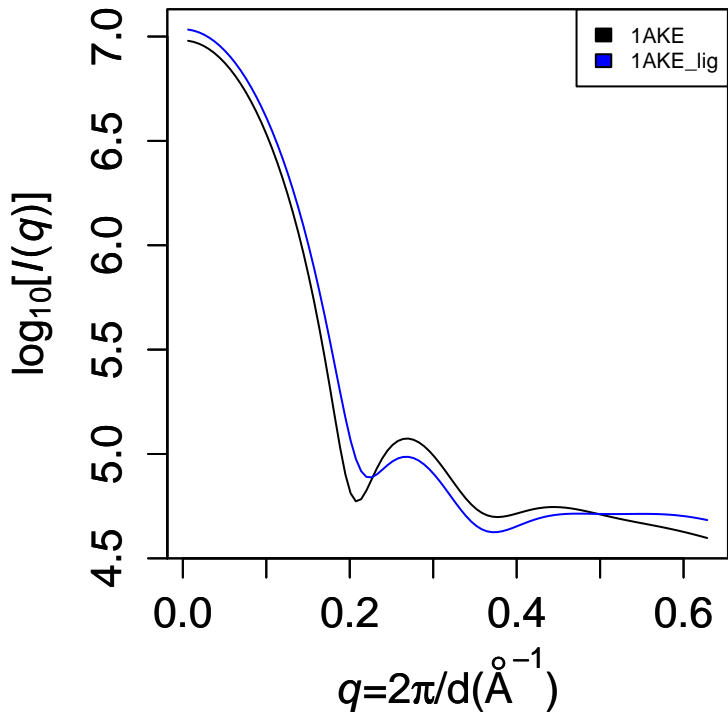

Supplement: NIHMS321248-supplement-07.pdf [file NIHMS321248-supplement-07.pdf]

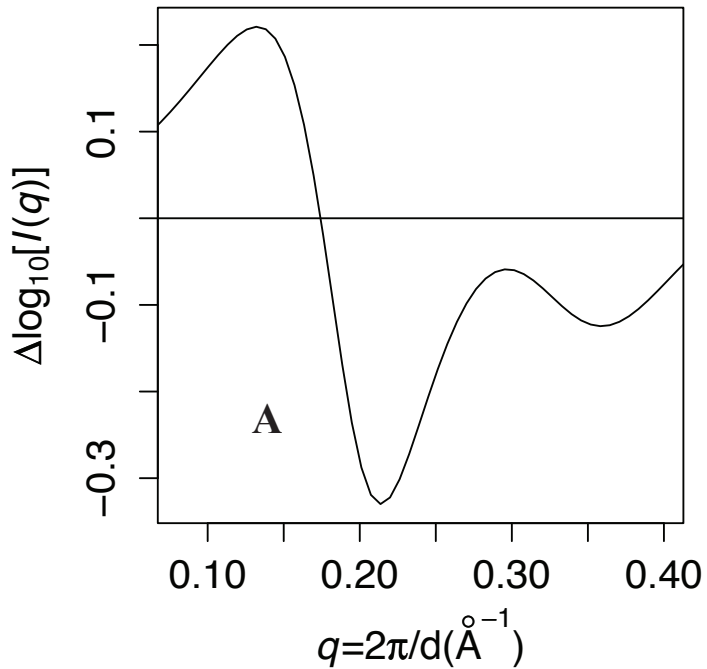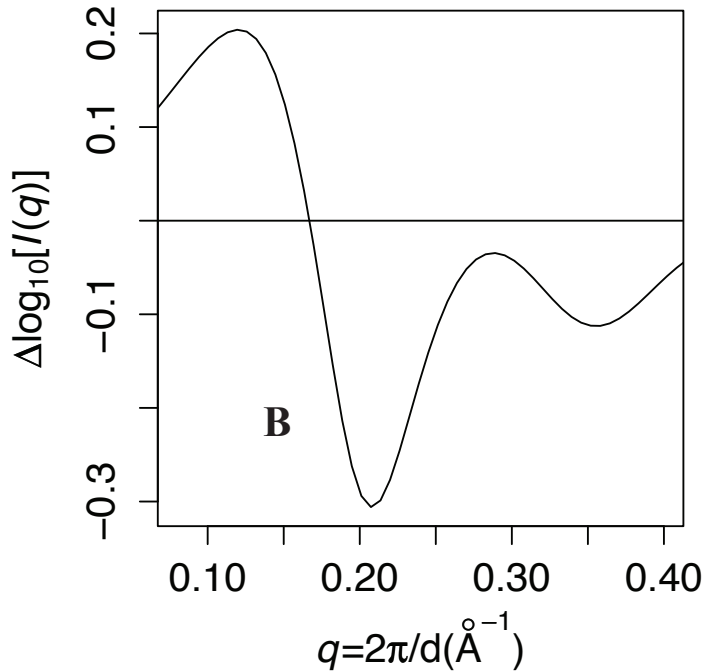

Supplement: NIHMS321248-supplement-08.pdf [file NIHMS321248-supplement-08.pdf]
